# Supplementary material
Source: Research Square preprint supplement (doi:10.21203/rs.3.rs-10014372/v1)
Supplement: Supplementary file 1 [file 093854df547800634550c04d.pdf]

Supplementary information

## **Molybdenum-catalysed electrochemical green ammonia synthesis from dinitrogen and water**

Ryoichi Kanega<sup>1\*</sup>, Kazuya Arashiba<sup>2</sup>, Erika Ishida<sup>1</sup>, Chieko Suzuki<sup>1</sup>, Mika Kusaba<sup>3</sup>, Yuma Ishitobi<sup>4</sup>, Yuki Shinohara<sup>3</sup>, Akihiro Ohira<sup>1</sup>, Yoshiaki Nishibayashi<sup>2\*</sup>

<sup>1</sup>Research Institute for Energy Efficient Technologies, National Institute of Advanced Industrial Science and Technology, Tsukuba Central 5, 1-1-1 Higashi, Tsukuba, Ibaraki, 305-8565, Japan

<sup>2</sup>Department of Applied Chemistry, School of Engineering, The University of Tokyo, Hongo, Bunkyo-ku, Tokyo 113-8656, Japan

<sup>3</sup>Advanced Technology Research Laboratories, Innovation Center, Idemitsu Kosan Co., Ltd., Kamizumi, Sodegaura, Chiba 299-0293, Japan

<sup>4</sup>Performance Materials Laboratories, Advanced Materials & Performance Chemicals Department, Advanced Materials Company, Idemitsu Kosan Co., Ltd., Anesakikaigan, Ichihara, Chiba 299-0193, Japan

\*Correspondence: r-kanega@aist.go.jp, ynishiba@g.ecc.u-tokyo.ac.jp

### Table of Contents

Supplementary Fig. 1-17

S3-S19

Supplementary Table 1-5

S20-S24

## General Methods.

All manipulations were carried out under an atmosphere of Ar by using standard glove-box techniques unless otherwise stated. Electrochemical investigations were conducted using a Hokuto Denko HZ-Pro electrochemical measurement system. NH<sub>3</sub> was analyzed using ion chromatography (ECO IC, Metrohm) with a TSKgel SuperIC-Cation HSII (4.6 mm I.D.×10 cm) column. <sup>1</sup>H and <sup>31</sup>P NMR spectra were recorded on a Bruker Avance 400 spectrometer. Mass spectra were recorded on an Agilent LC/MSD iQ. [MoI<sub>3</sub>(PCP)] (**1a**; PCP = 1,3-bis((di-*tert*-butylphosphino)methyl)benzimidazol-2-ylidene)<sup>S1</sup>, [Mo(N)I(PCP)] (**2a**)<sup>S2</sup>, [Mo(N)I(PCP<sup>CF3</sup>)] (**2b**; PCP<sup>CF3</sup> = 1,3-bis((di-*tert*-butylphosphino)methyl)-5-(trifluoromethyl)benzimidazol-2-ylidene)<sup>S2</sup>, 2,4,6-trimethylpyridinium trifluoromethanesulfonate ([CoH]OTf)<sup>S3</sup> were prepared according to the literature methods. The chemicals and carbon felt electrodes (AAF304ZS, Toyobo) were purchased from commercial suppliers and were used without further purification or treatment.

## H<sub>2</sub> and O<sub>2</sub> quantification and faradaic efficiency (FE) calculation

H<sub>2</sub> and O<sub>2</sub> were quantified by gas chromatography (Shimadzu GC-8A) equipped with a thermal conductivity detector and a Molecular Sieve 5A column. Gas samples were collected periodically during electrolysis (0.1 mL for H<sub>2</sub> analysis and 0.5 mL for O<sub>2</sub> analysis), and the gas flow rate was measured simultaneously. Assuming that the gas flow rate and gas composition remained constant between sampling points, the total gas volume in each interval was estimated as  $V_i = F_i \Delta t_i$ , where  $F_i$  is the gas flow rate and  $\Delta t_i$  is the sampling interval. The amounts of H<sub>2</sub> and O<sub>2</sub> evolved in each interval were then calculated from the GC determined gas composition and  $V_i$ . The FE was calculated according to the following equation. Since it was difficult to distinguish N<sub>2</sub> crossover from the counter electrode from N<sub>2</sub> introduced by leakage during sampling, all detected N<sub>2</sub> was assumed to originate from leakage. The amount of O<sub>2</sub> produced was calculated by subtracting the corresponding leakage-derived O<sub>2</sub>, estimated from the detected N<sub>2</sub>, from the total detected O<sub>2</sub>.  $F$  is the faradaic constant (96485 C mol<sup>-1</sup>) and  $Q$  is the total charge passed during electrolysis.

$$\text{FE (\%)}: \frac{\text{H}_2 \text{ (mol)} \times 2 \times F \text{ (C mol}^{-1}\text{)}}{Q \text{ (C)}} \times 100$$

$$\text{FE (\%)}: \frac{\text{O}_2 \text{ (mol)} \times 4 \times F \text{ (C mol}^{-1}\text{)}}{Q \text{ (C)}} \times 100$$

**a** Electrochemical ammonia synthesis using TEMPO as a sacrificial electron source (**System 1**)

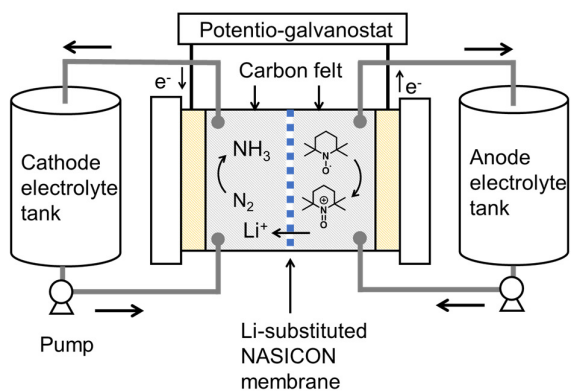

Overall reaction

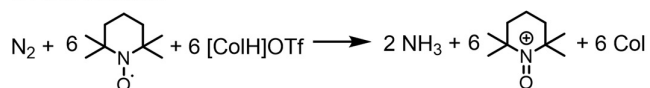

Cathode reaction

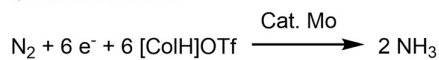

Anode reaction

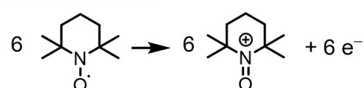

**b** Electrochemical ammonia synthesis using ethylene glycol as electron and proton sources (**System 2**)

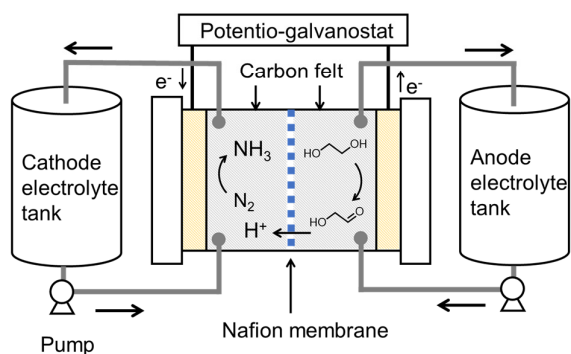

Overall reaction

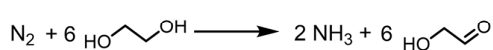

Cathode reaction

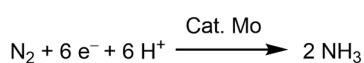

Anode reaction

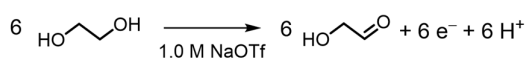

**Supplementary Fig. 1 | Electrochemical ammonia synthesis with a flow-type electrochemical cell. a**, Using TEMPO as a sacrificial electron source (**System 1**). **b**, Using ethylene glycol as electron and proton sources (**System 2**).

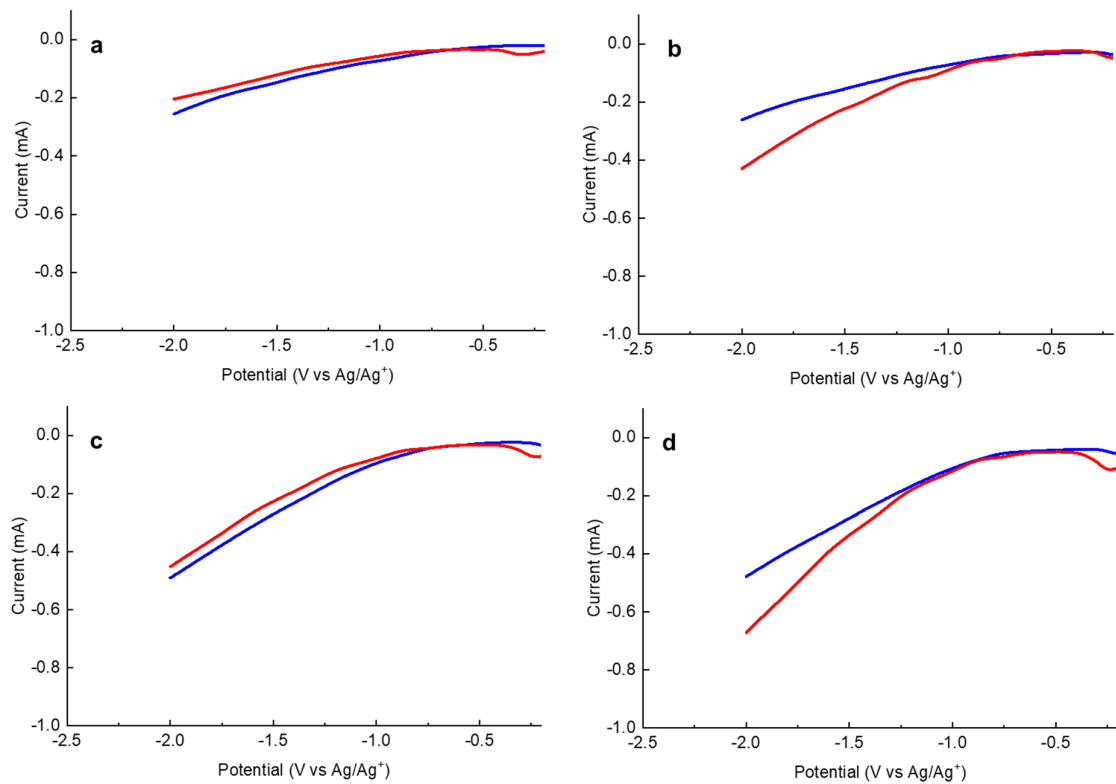

**Supplementary Fig. 2 | Linear sweep voltammograms.** Linear sweep voltammetry was conducted in 1.0 M LiOTf THF solution under Ar (blue) or N<sub>2</sub> (red) containing **a**, 1.0 mM **2a**, **b**, 1.0 mM **2a** and 1.0 mM [ColH]OTf, **c**, 1.0 mM **2b**, **d**, 1.0 mM **2b** and 1.0 mM [ColH]OTf.

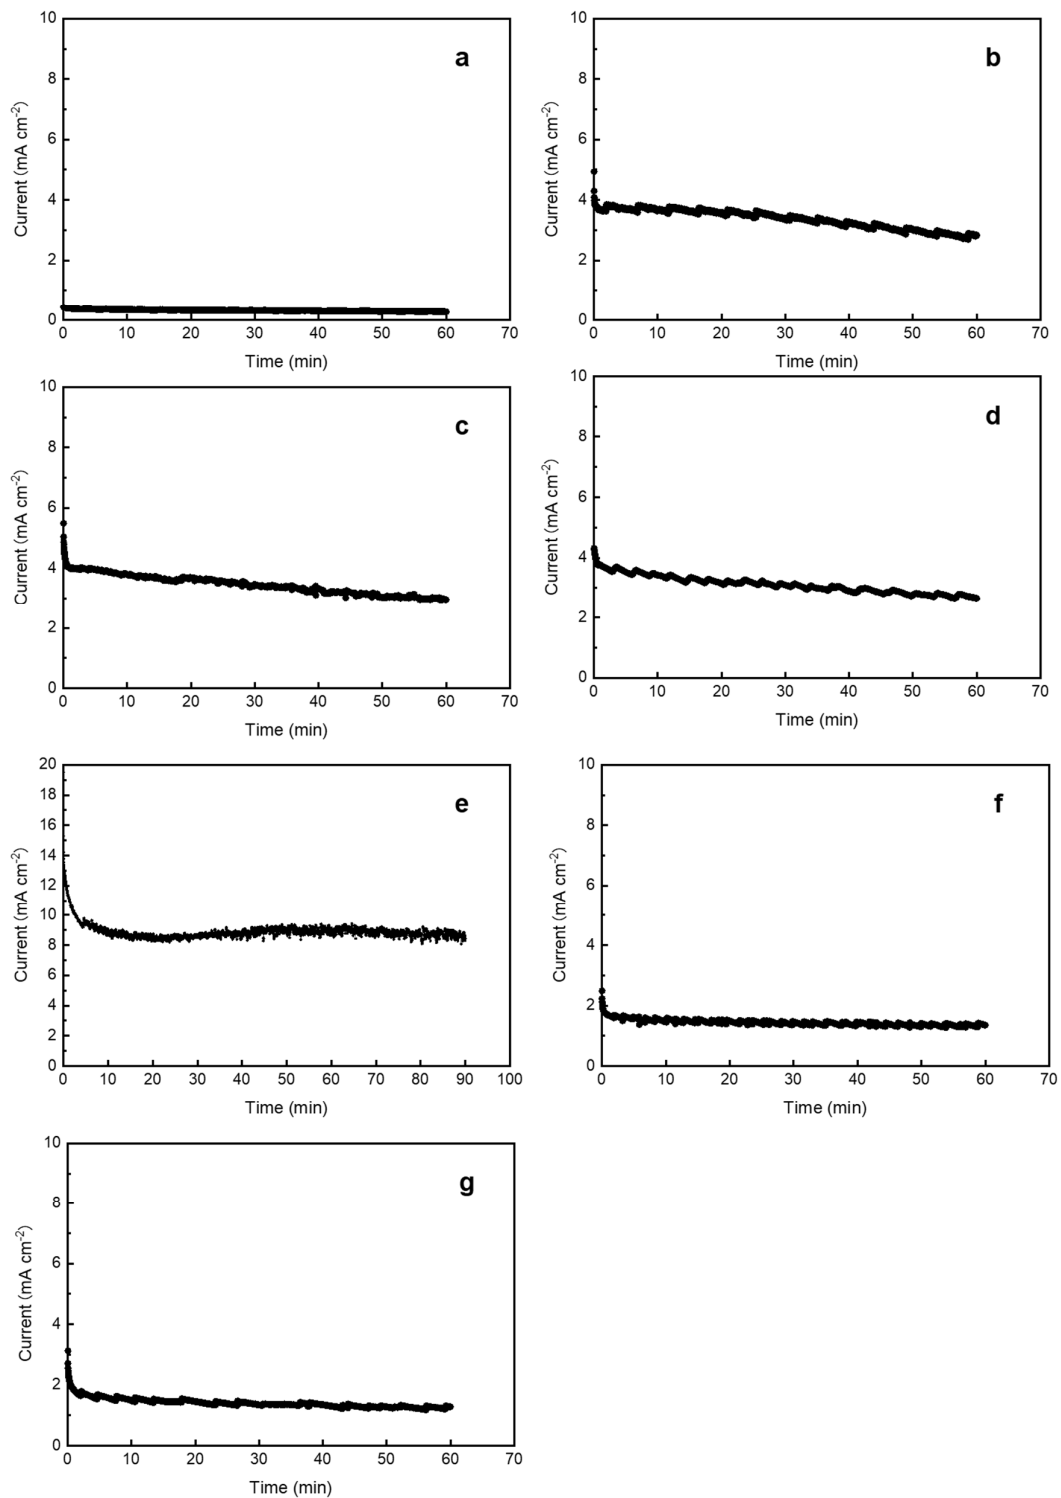

**Supplementary Fig. 3 | Current density profiles corresponding to Table 1. a**, at  $-0.5$  V vs  $\text{Ag}/\text{Ag}^+$  (Entry 2). **b**, at  $-0.8$  V vs  $\text{Ag}/\text{Ag}^+$  (Entry 1). **c**, at  $-1.2$  V vs  $\text{Ag}/\text{Ag}^+$  (Entry 3). **d**, at  $-1.5$  V vs  $\text{Ag}/\text{Ag}^+$  (Entry 4). **e**, optimized conditions (Entry 5). **f**, in the absence of **1a** (Entry 7). **g**, under Ar (Entry 8).

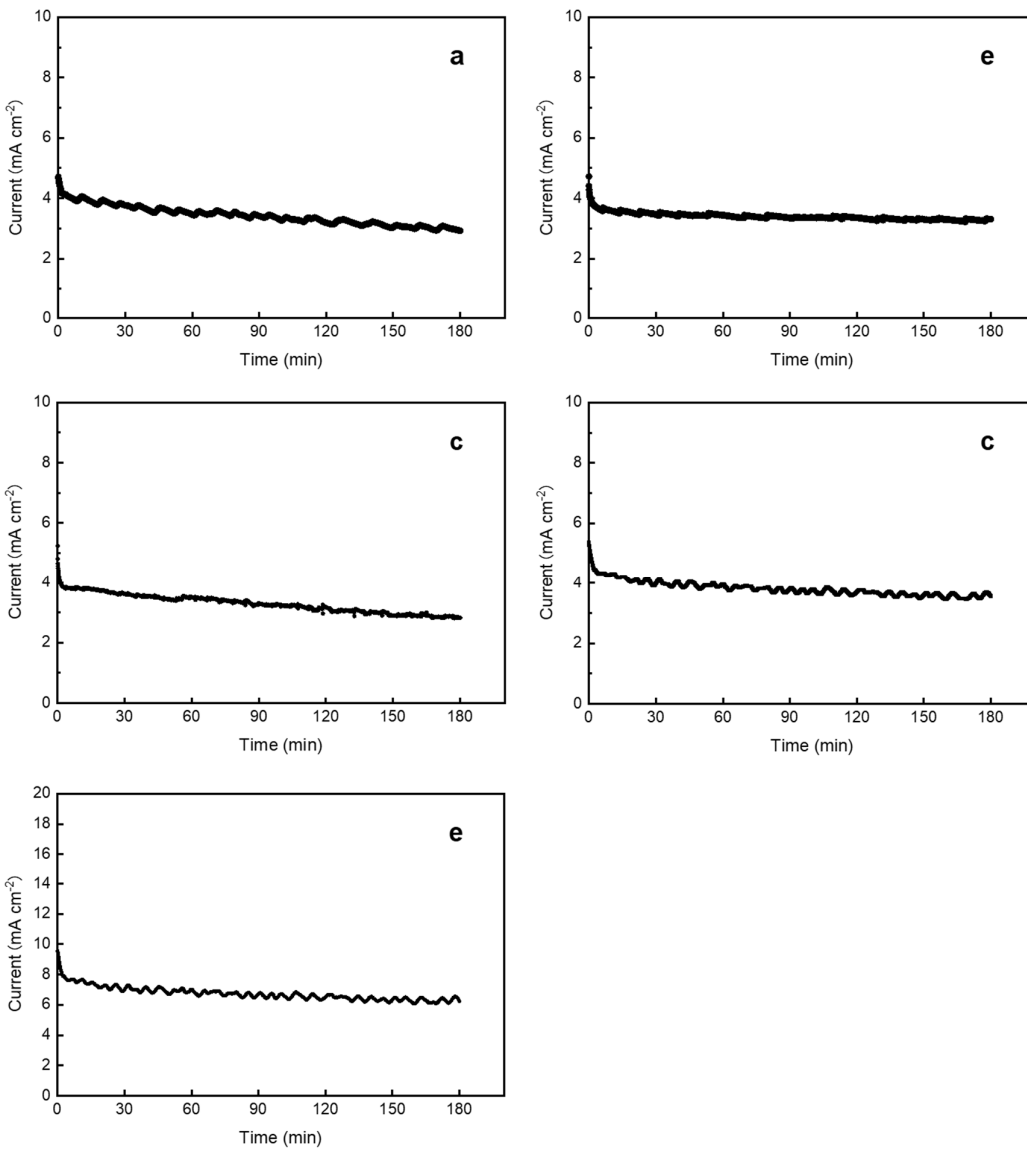

**Supplementary Fig. 4 | Current density profiles in the presence of various concentrations of [ColH]OTf corresponding to Table 2. a**, In the absence of [ColH]OTf (Entry 1). **b**, 2.5 mM (15  $\mu$ mol, Entry 2). **c**, 10 mM (60  $\mu$ mol, Entry 3). **d**, 30 mM (180  $\mu$ mol, Entry 4). **e**, 100 mM (600  $\mu$ mol, Entry 5).

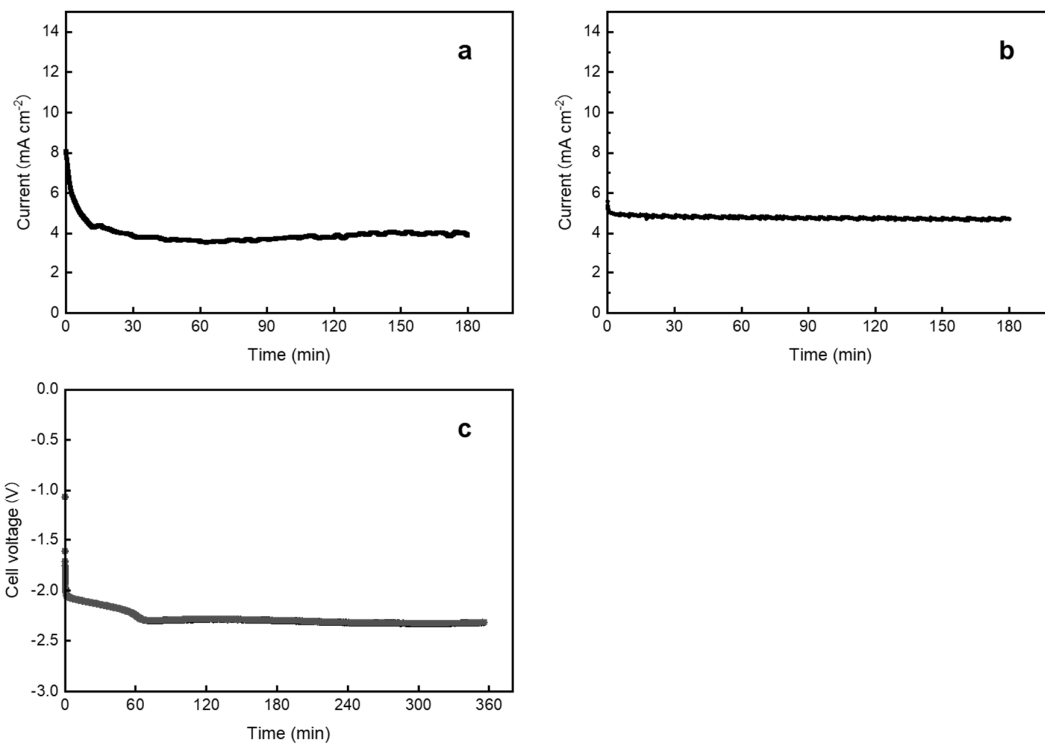

**Supplementary Fig. 5 | Current density and cell voltage profiles corresponding to Table 2. a,** In the presence of **2a** (Entry 6). **b,** In the presence of **2b** (Entry 7). **c,** galvanostatic electrolysis (Entry 8).

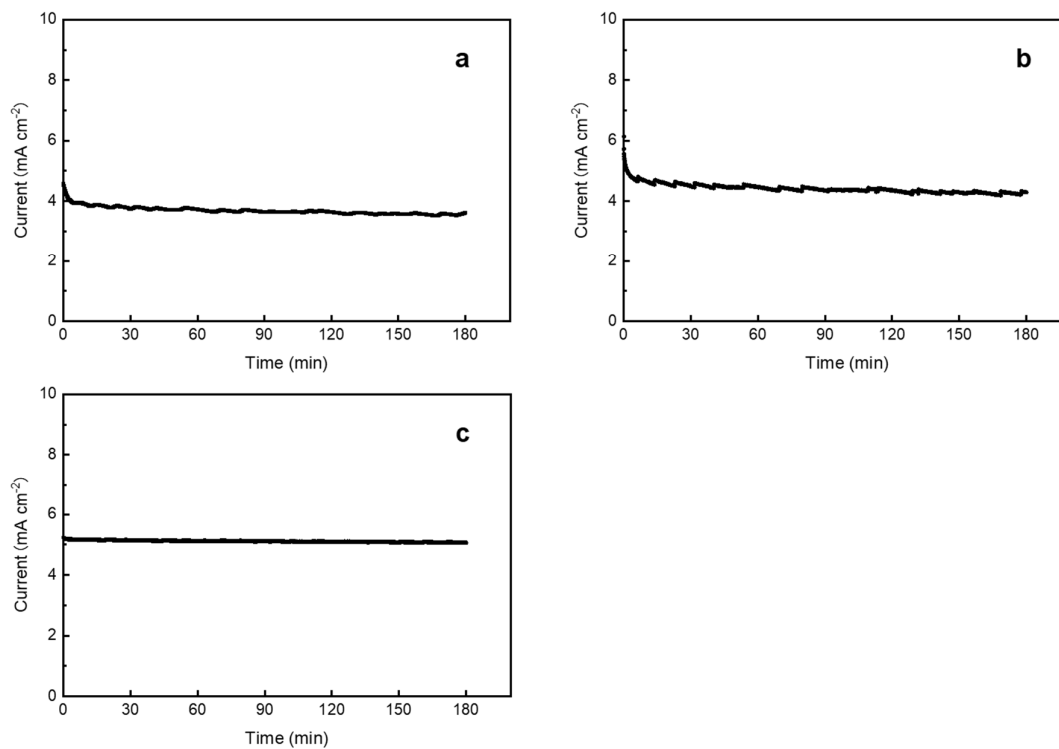

**Supplementary Fig. 6 | Current density profiles with different electrolyte flow rates corresponding to Supplementary Table 1. a, At 5 mL min<sup>-1</sup> (Entry 1). b, At 10 mL min<sup>-1</sup> (Entry 2). c, At 40 mL min<sup>-1</sup> (Entry 4).**

**a**  
Symmetric cell setup diagram

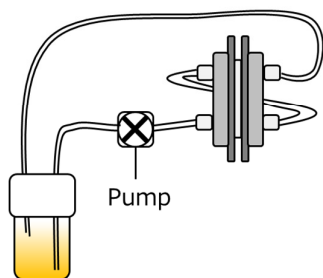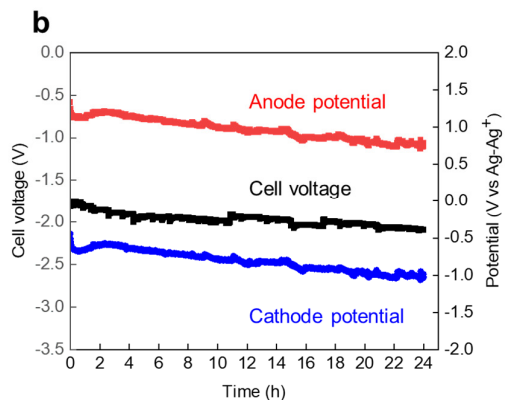

**Supplementary Fig. 7 | Electrochemical durability test of 2b using a symmetric cell. a,** Symmetric cell diagram. **b,** Cell voltage and potential profile. Electrolyte, **2b** and 1 M LiOTf in THF; separator, Poreflon (HPW-010-30); Electrode area, 2.5 cm<sup>2</sup>; Electrolyte flow rate, 12.5 mL min<sup>-1</sup>; N<sub>2</sub> flow rate, 2.5 mL min<sup>-1</sup>; Current density, 10 mA cm<sup>-2</sup>.

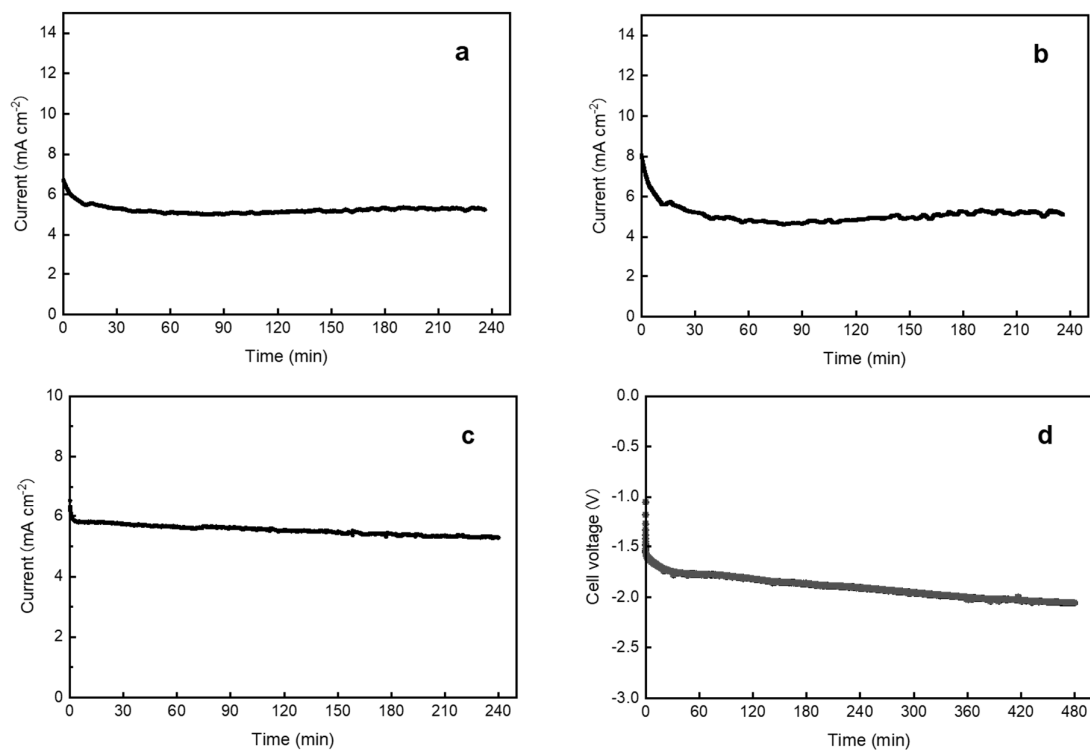

**Supplementary Fig. 8 | Current density and cell voltage profiles corresponding to Table 3. a,** In the presence of **1a** (Entry 1). **b,** In the presence of **2a** (Entry 2). **c,** In the presence of **2b** (Entry 3). **d,** galvanostatic electrolysis (Entry 4).

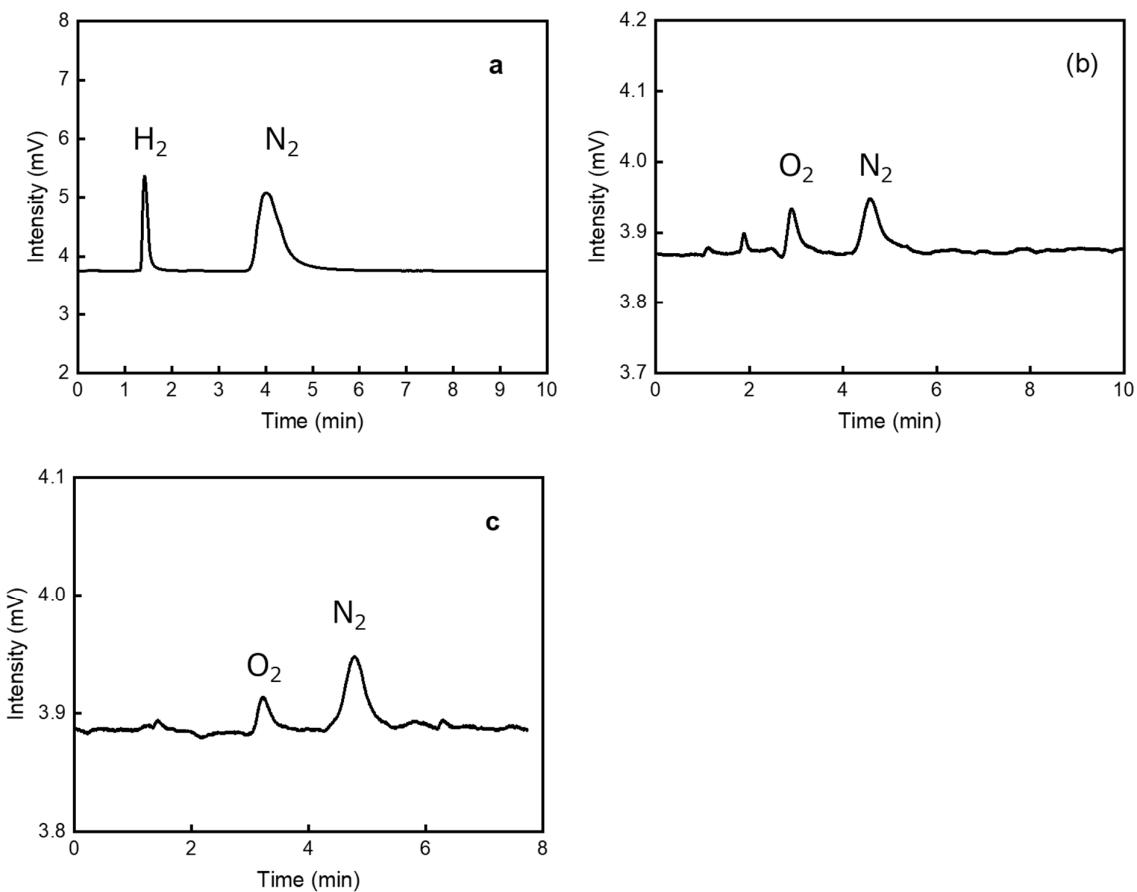

**Supplementary Fig. 9 | Gas chromatograms for a,  $H_2$ , b,  $O_2$  and c, Blank sample obtained before electrolysis.**

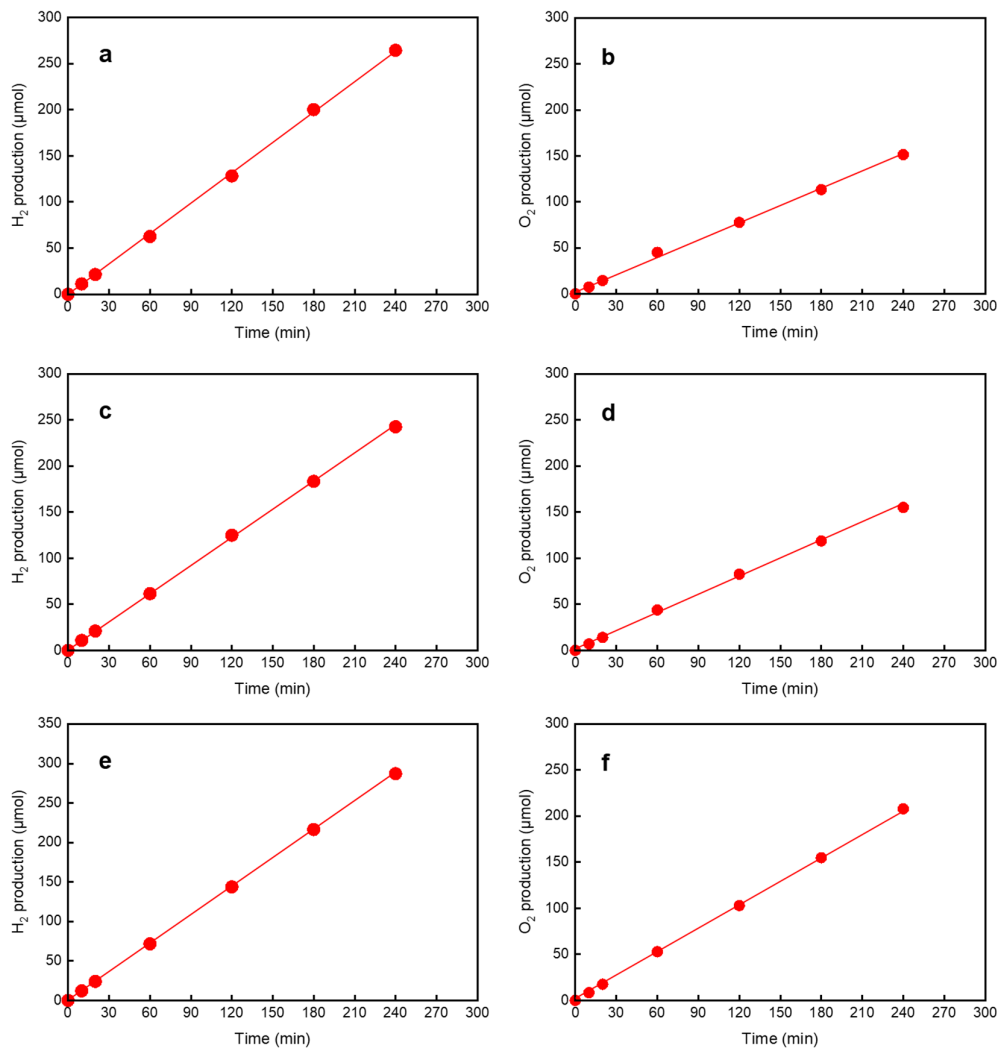

**Supplementary Fig. 10 | Time course of H<sub>2</sub> and O<sub>2</sub> production with System 3 corresponding to Table 3. a, H<sub>2</sub> production in the presence of **1a** (Entry 1). b, O<sub>2</sub> production in the presence of **1a** (Entry 1). c, H<sub>2</sub> production in the presence of **2a** (Entry 2). d, O<sub>2</sub> production in the presence of **2a** (Entry 2). e, H<sub>2</sub> production in the presence of **2b** (Entry 3). f, O<sub>2</sub> production in the presence of **2b** (Entry 3).**

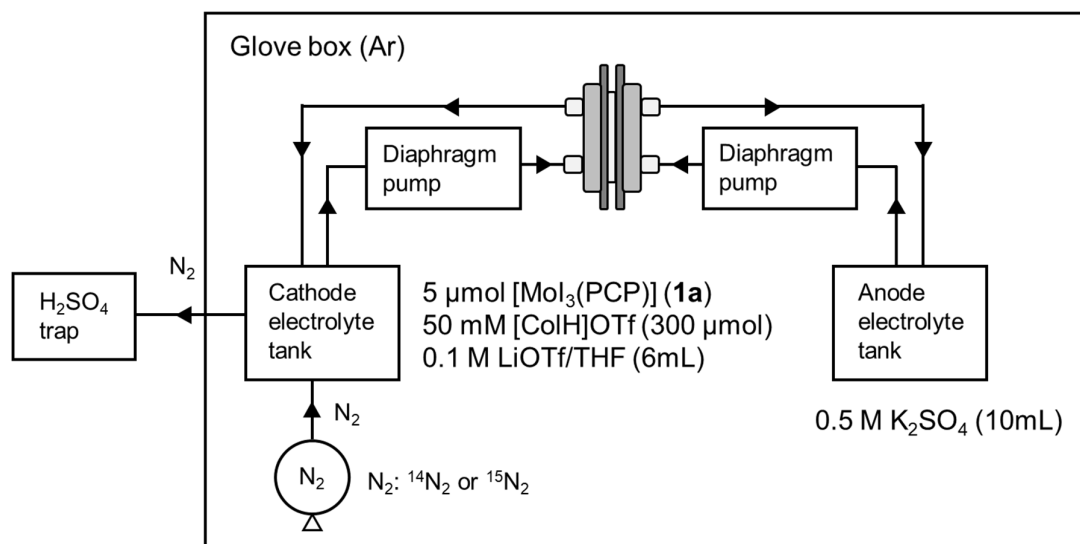

**Supplementary Fig. 11 | Set up for an electrochemical  $\text{NH}_3$  synthesis using  $^{15}\text{N}_2$ .**

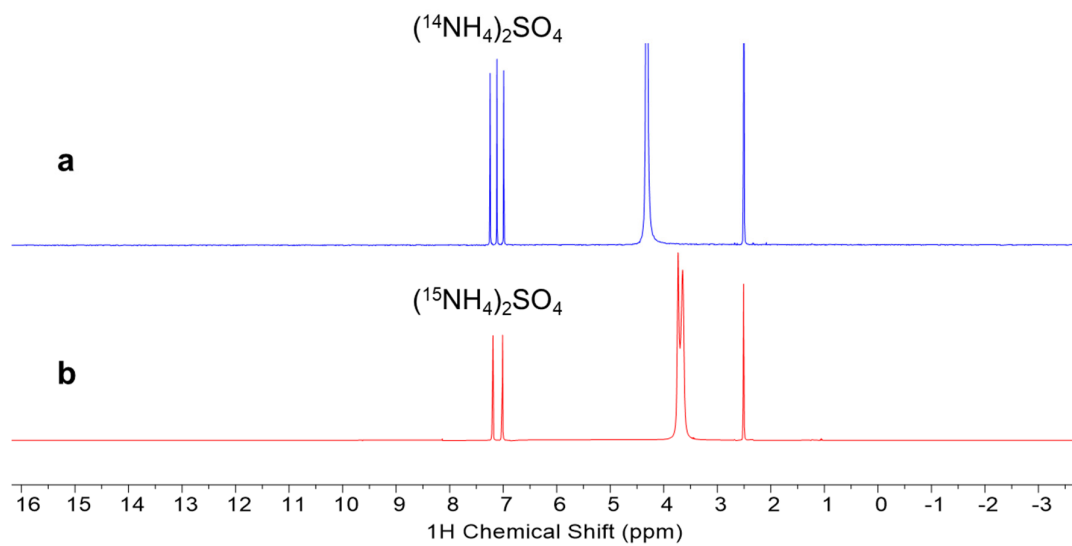

**Supplementary Fig. 12 |  $^1\text{H}$  NMR spectra ( $\text{DMSO-}d_6$ ) of the volatile products obtained for Supplementary Fig. 11. a, Under  $^{14}\text{N}_2$ . b, Under  $^{15}\text{N}_2$ .**

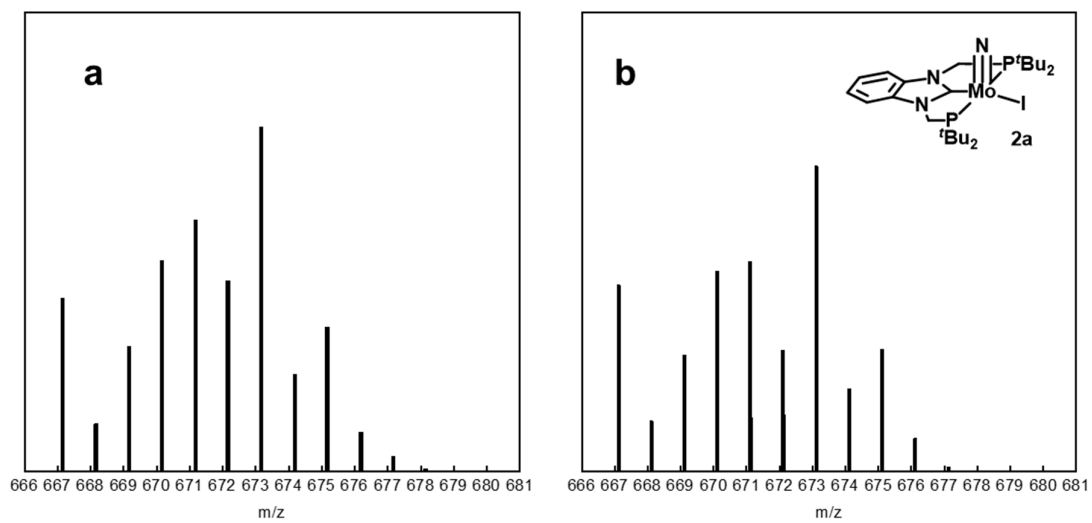

**Supplementary Fig. 13** | **a**, Mass spectrum of the products obtained after electrolysis of  $[\text{MoI}_3(\text{PCP})]$  **1a** under  $\text{N}_2$ . **b**, Calculated spectrum of  $[\text{Mo}(\text{N})\text{I}(\text{PCP})]$  **2a**.

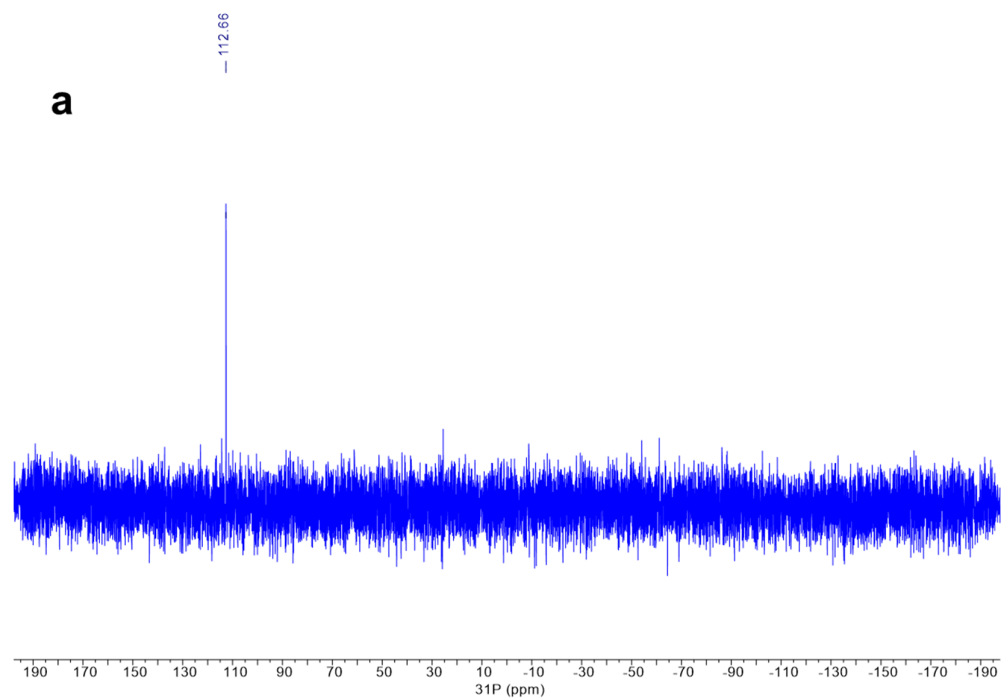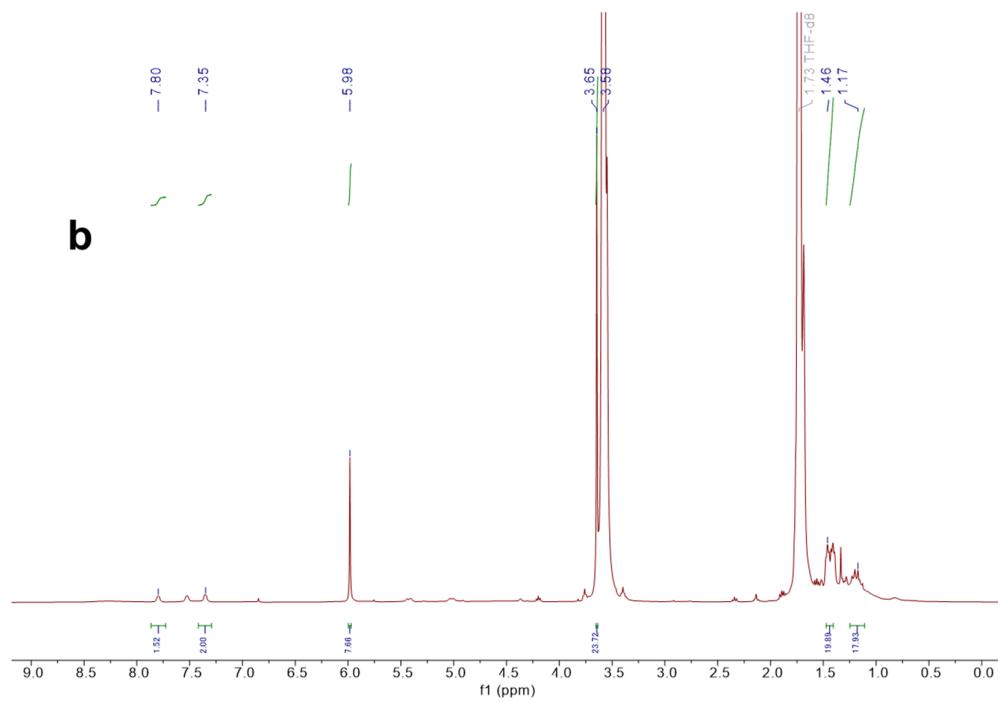

**Supplementary Fig. 14** | **a**,  $^{31}\text{P}$  and **b**,  $^1\text{H}$  NMR spectra of the products obtained after electrolysis of **1a** under  $\text{N}_2$ .

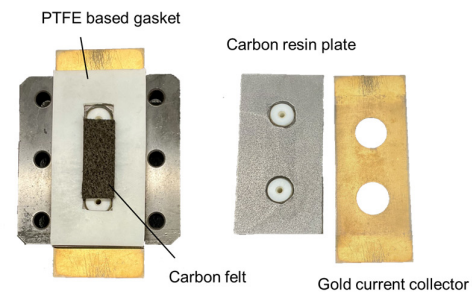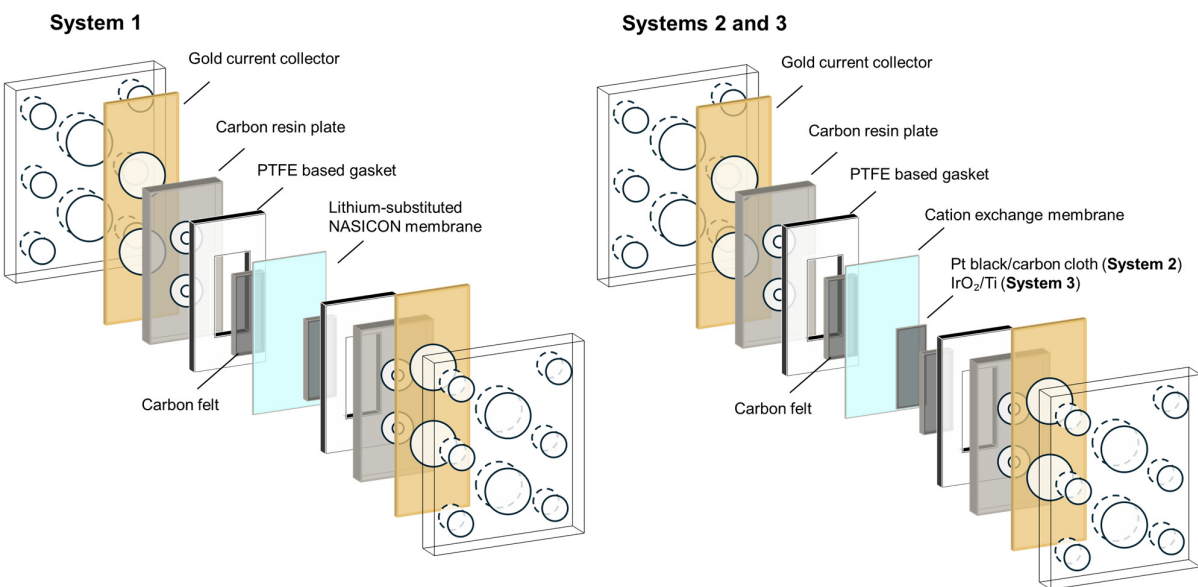

**Supplementary Fig. 15 | Photograph of a flow cell for an electrochemical NH<sub>3</sub> synthesis.** The flow cell was assembled by stacking a gold current collector, a carbon-resin plate and a 3 mm-thick PTFE-based gasket. A carbon felt electrode (Toyobo AAF304ZS) was placed inside the gasket, and the membrane was then placed on top of the electrode. The counter side was assembled in the same manner, and the cell was tightened with bolts.

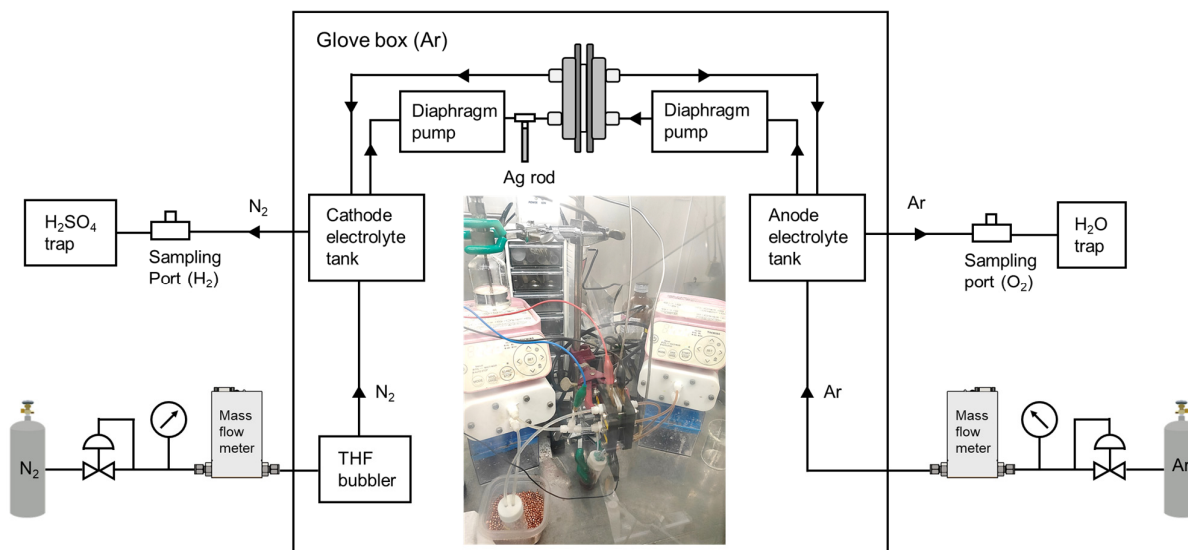

**Supplementary Fig. 16 | Set-up of flow system for an electrochemical NH<sub>3</sub> synthesis.** The cathode electrolyte was bubbled with N<sub>2</sub> for 10 min before electrolysis. The cathode and anode electrolytes were then circulated for 30 min to condition the membrane. After electrolyte circulation, electrolysis was carried out at the specified potential or current density.

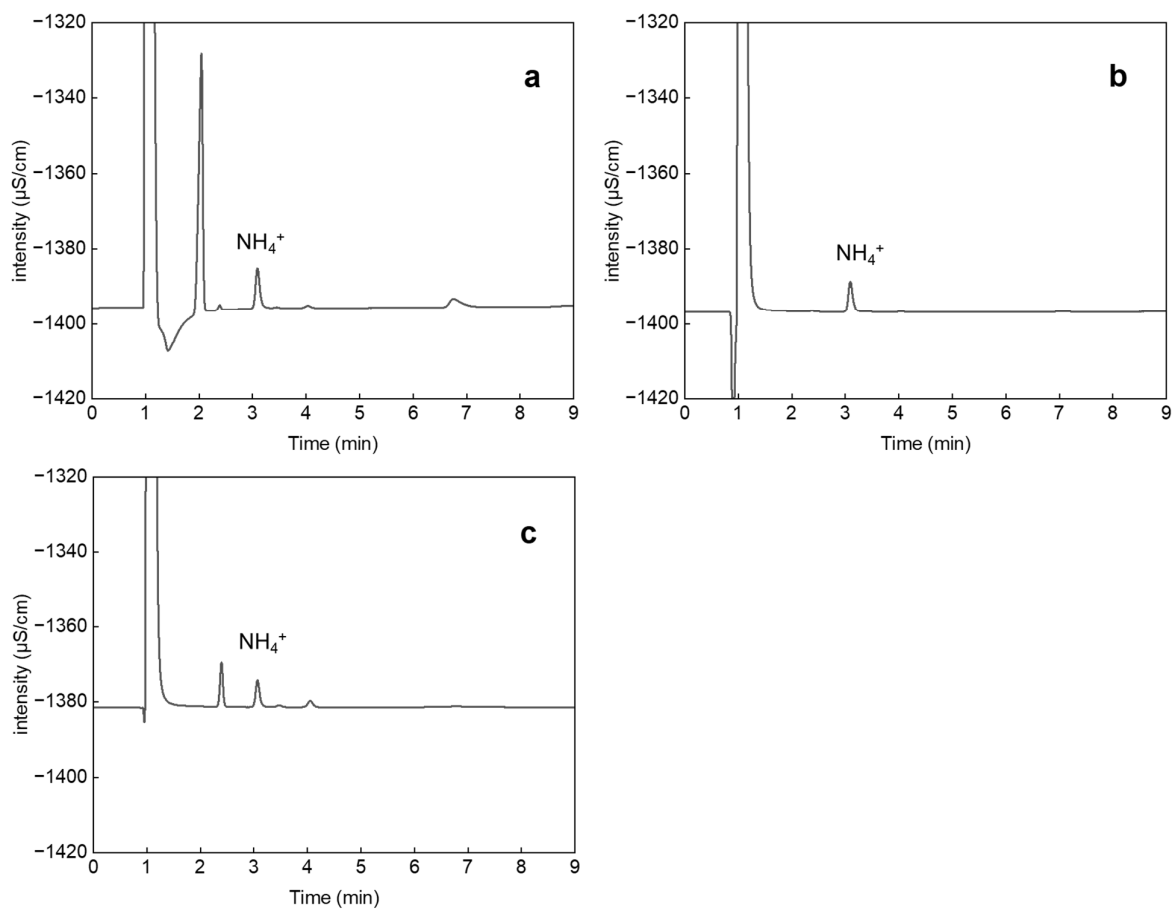

**Supplementary Fig. 17 | Ion chromatograms of the products obtained for Table 3 (Entry 4). a,** Cathode electrolyte. **b,**  $\text{H}_2\text{SO}_4$  trap solution. **c,**  $50 \mu\text{M}$   $\text{NH}_4^+$  standard solution.

**Supplementary Table 1 | Effect of electrolyte flow rate on electrochemical NH<sub>3</sub> synthesis with System 2.**

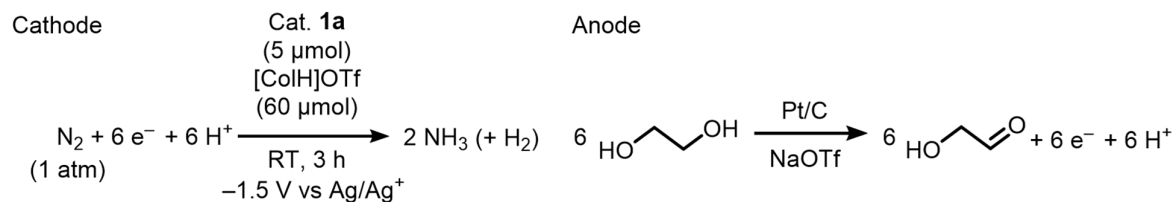

| Entry | Electrolyte flow rate (mL min <sup>-1</sup> ) | Average current density (mA cm <sup>-2</sup> ) | NH <sub>3</sub> production (μmol) | NH <sub>3</sub> production (equiv. based on Mo) | FE (%) |
|-------|-----------------------------------------------|------------------------------------------------|-----------------------------------|-------------------------------------------------|--------|
| 1     | 5                                             | 3.0                                            | 20.5                              | 4.1                                             | 14     |
| 2     | 10                                            | 3.3                                            | 23.8                              | 4.8                                             | 15     |
| 3     | 20                                            | 3.8                                            | 26.5                              | 5.3                                             | 14     |
| 4     | 40                                            | 3.9                                            | 10.2                              | 2.0                                             | 5      |

Cathode electrolyte, 1.0 M LiOTf and 10 mM [CoIH]OTf in THF (6 mL); anode electrolyte, 1.0 M NaOTf in ethylene glycol (6 mL); N<sub>2</sub> flow rate, 2.5 mL min<sup>-1</sup>; separator, cation exchange membrane; applied potential, -1.5 V versus Ag/Ag<sup>+</sup>; cathode, 1 × 1.3 cm; anode, 1 × 2.5 cm.

**Supplementary Table 2 | NH<sub>3</sub> production and FE corresponding to Table 2 (Entries 8 and 9).**

| Entry   | Time (h) | NH <sub>3</sub> production (μmol) | NH <sub>3</sub> production (equiv. based on Mo complex) | FE (%)   |
|---------|----------|-----------------------------------|---------------------------------------------------------|----------|
| 1       | 1        | 36.0                              | 7.2                                                     | 64       |
| 2       | 1        | 38.2                              | 7.6                                                     | 66       |
| average |          | 37.1 ± 1.6                        | 7.4 ± 0.3                                               | 65 ± 1.4 |
| 3       | 2        | 78.3                              | 16                                                      | 63       |
| 4       | 2        | 83.2                              | 17                                                      | 67       |
| average |          | 80.8 ± 3.5                        | 17 ± 0.7                                                | 65 ± 2.8 |
| 5       | 3        | 117.5                             | 24                                                      | 63       |
| 6       | 3        | 122.0                             | 24                                                      | 65       |
| average |          | 119.8 ± 3.2                       | 24                                                      | 64 ± 1.4 |
| 7       | 6        | 216.3                             | 43                                                      | 58       |
| 8       | 6        | 227.3                             | 45                                                      | 61       |
| average |          | 221.8 ± 7.8                       | 44 ± 1.4                                                | 60 ± 2.1 |
| 9       | 18       | 537.1                             | 107                                                     | 48       |
| 10      | 18       | 549.5                             | 109                                                     | 49       |
| average |          | 543.3 ± 8.8                       | 108 ± 1.4                                               | 49 ± 0.7 |

Errors represent standard deviations of two independent runs.

**Supplementary Table 3 | Electrochemical NH<sub>3</sub> synthesis with System 3.**

| Cathode |                                                       | Cat. <b>1a</b><br>(5 μmol)<br>[CoH]OTf<br>(120 μmol) |                                      | Anode                                                         |                                        |                                                                                        |
|---------|-------------------------------------------------------|------------------------------------------------------|--------------------------------------|---------------------------------------------------------------|----------------------------------------|----------------------------------------------------------------------------------------|
|         | $\text{N}_2 + 6 \text{e}^- + 6 \text{H}^+$<br>(1 atm) | $\xrightarrow{\text{RT, 4 h}}$                       | $2 \text{NH}_3 (+ \text{H}_2)$       | $3 \text{H}_2\text{O}$                                        | $\xrightarrow{\text{IrO}_2/\text{Ti}}$ | $3/2 \text{O}_2 + 6 \text{e}^- + 6 \text{H}^+$<br>0.5 M K <sub>2</sub> SO <sub>4</sub> |
| Entry   | Cathode potential<br>(V vs Ag/Ag <sup>+</sup> )       | Average current density<br>(mA cm <sup>-2</sup> )    | NH <sub>3</sub> production<br>(μmol) | NH <sub>3</sub> production<br>(equiv. based<br>on Mo complex) | Number of<br>recycling of<br>[CoH]OTf  | FE<br>(%)                                                                              |
| 1       | -1.0                                                  | 3.4                                                  | 41.6                                 | 8.3                                                           | 1.0                                    | 19                                                                                     |
| 2       | -1.2                                                  | 4.0                                                  | 58.3                                 | 12                                                            | 1.5                                    | 23                                                                                     |
| 3       | -1.5                                                  | 6.4                                                  | 45.4                                 | 9.0                                                           | 1.1                                    | 11                                                                                     |

Cathode electrolyte, 0.5 M LiOTf and 20 mM [CoH]OTf in THF (6 mL); anode electrolyte, 0.5 M K<sub>2</sub>SO<sub>4</sub> (10 mL); N<sub>2</sub> flow rate, 2.5 mL min<sup>-1</sup>; electrolyte flow rate, 5 mL min<sup>-1</sup>; separator, cation exchange membrane; cathode, 1 × 1.3 cm; anode, 1 × 2.5 cm.

**Supplementary Table 4 | Production and FE of H<sub>2</sub> and O<sub>2</sub> corresponding to Table 3.**

| Cathode                                               |           | Cat. Mo<br>(5 μmol)<br>[CoH]OTf<br>(120 μmol)                  | Anode                                |                        |                                                                                |                                                |                                     |           |
|-------------------------------------------------------|-----------|----------------------------------------------------------------|--------------------------------------|------------------------|--------------------------------------------------------------------------------|------------------------------------------------|-------------------------------------|-----------|
| $\text{N}_2 + 6 \text{e}^- + 6 \text{H}^+$<br>(1 atm) |           | $\xrightarrow{\text{RT, 4 h}}$<br>-1.2 V vs Ag/Ag <sup>+</sup> | $2 \text{NH}_3 (+ \text{H}_2)$       | $3 \text{H}_2\text{O}$ | $\xrightarrow{\text{IrO}_2/\text{Ti}}$<br>0.5 M K <sub>2</sub> SO <sub>4</sub> | $3/2 \text{O}_2 + 6 \text{e}^- + 6 \text{H}^+$ |                                     |           |
| Entry                                                 | Cat. Mo   | Average current density<br>(mA cm <sup>-2</sup> )              | NH <sub>3</sub> production<br>(μmol) | FE<br>(%)              | H <sub>2</sub> production<br>(μmol)                                            | FE<br>(%)                                      | O <sub>2</sub> production<br>(μmol) | FE<br>(%) |
| 1                                                     | <b>1a</b> | 4.0                                                            | 58.3                                 | 23                     | 250.7                                                                          | 65                                             | 162.9                               | 84        |
| 2                                                     | <b>2a</b> | 3.9                                                            | 64.8                                 | 26                     | 242.5                                                                          | 64                                             | 155.1                               | 82        |
| 3                                                     | <b>2b</b> | 5.4                                                            | 96.5                                 | 28                     | 286.9                                                                          | 55                                             | 206.6                               | 79        |

Cathode electrolyte, 0.1 M LiOTf and 20 mM [CoH]OTf in THF (6 mL); anode electrolyte, 0.5 M K<sub>2</sub>SO<sub>4</sub> (6 mL); N<sub>2</sub> flow rate, 2.5 mL min<sup>-1</sup>; electrolyte flow rate, 20 mL min<sup>-1</sup>; separator, cation exchange membrane; applied potential, -1.2 V versus Ag/Ag<sup>+</sup>; cathode, 1 × 1.3 cm; anode, 1 × 2.5 cm.

**Supplementary Table 5 | Comparison of electrochemical NH<sub>3</sub> synthesis systems with uphill overall reactions using heterogeneous catalysts.**

| Entry | Catalyst                | Electrolyte                                                                      | FE (%) | Current density                             | Partial current density for NH <sub>3</sub> production | Ref.      |
|-------|-------------------------|----------------------------------------------------------------------------------|--------|---------------------------------------------|--------------------------------------------------------|-----------|
| 1     | Eex-COF/NC              | 0.1 M KOH                                                                        | 45     | 0.1 mA cm <sup>-2</sup> at -0.2 V vs RHE    | < 0.1 mA cm <sup>-2</sup>                              | S4        |
| 2     | GDY/Co <sub>2</sub> N   | 0.1 M Na <sub>2</sub> SO <sub>4</sub>                                            | 59     | 0.5 mA cm <sup>-2</sup> at 0.055 V vs RHE   | 0.2 mA cm <sup>-2</sup>                                | S5        |
| 3     | Co <sub>SC</sub> -N-C   | 0.1 M KOH                                                                        | 52     | 0.5 mA cm <sup>-2</sup> at -0.2 V vs. RHE   | 0.2 mA cm <sup>-2</sup>                                | S6        |
| 4     | Pd-GDY                  | 0.1 M Na <sub>2</sub> SO <sub>4</sub>                                            | 32     | 0.25 mA cm <sup>-2</sup> at -0.16 V vs. RHE | 0.1 mA cm <sup>-2</sup>                                | S7        |
| 5     | Pd/HsGDY                | 0.05 M H <sub>2</sub> SO <sub>4</sub>                                            | 46     | 0.1 mA cm <sup>-2</sup> at -0.25 V vs RHE   | < 0.1 mA cm <sup>-2</sup>                              | S8        |
| 6     | F-doped carbon          | 0.05 M H <sub>2</sub> SO <sub>4</sub>                                            | 45     | 0.5 mA cm <sup>-2</sup> at -0.3 V vs RHE    | 0.2 mA cm <sup>-2</sup>                                | S9        |
| 7     | PAL-MoS <sub>2</sub>    | 0.1 M HCl                                                                        | 44     | 0.1 mA cm <sup>-2</sup> at -0.1 V vs RHE    | < 0.1 mA cm <sup>-2</sup>                              | S10       |
| 8     | BiNCs                   | 0.5 M K <sub>2</sub> SO <sub>4</sub>                                             | 66     | 0.8 mA cm <sup>-2</sup> at -0.6 V vs RHE    | 0.5 mA cm <sup>-2</sup>                                | S11       |
| 9     | Ru@ZrO <sub>2</sub> /NC | 0.1 M HCl                                                                        | 21     | 1.6 mA cm <sup>-2</sup> at -0.21 V vs RHE   | 0.3 mA cm <sup>-2</sup>                                | S12       |
| 10    | Fe-SAs/LCC/GC           | 0.1 M KOH                                                                        | 31     | 0.25 mA cm <sup>-2</sup> at -0.1 V vs RHE   | 0.1 mA cm <sup>-2</sup>                                | S13       |
| 11    | Fe/Co-O-C-1.0           | 0.1 M Na <sub>2</sub> SO <sub>4</sub>                                            | 70     | 1.5 mA cm <sup>-2</sup> at -0.3 V vs. RHE   | 1.1 mA cm <sup>-2</sup>                                | S14       |
| 12    | <b>2b</b>               | Cathode:<br>0.1 M LiOTf in THF<br>Anode:<br>0.5 M K <sub>2</sub> SO <sub>4</sub> | 39     | 5.0 mA cm <sup>-2</sup>                     | 2.0 mA cm <sup>-2</sup>                                | This work |

## References

- S1 Eizawa, A. *et al.* Catalytic Reactivity of Molybdenum–Trihalide Complexes Bearing PCP-Type Pincer Ligands. *Chem. Asian J.* **14**, 2091–2096 (2019). <https://doi.org/10.1002/asia.201900496>
- S2 Ashida, Y. *et al.* Catalytic production of ammonia from dinitrogen employing molybdenum complexes bearing N-heterocyclic carbene-based PCP-type pincer ligands. *Nat. Synth.* **2**, 635–644 (2023). <https://doi.org/10.1038/s44160-023-00292-9>
- S3 Arashiba, K. *et al.* Catalytic Reduction of Dinitrogen to Ammonia by Use of Molybdenum-Nitride Complexes Bearing a Tridentate Triphosphine as Catalysts. *J. Am. Chem. Soc.* **137**, 5666–5669 (2015). <https://doi.org/10.1021/jacs.5b02579>
- S4 Liu, S. *et al.* Facilitating nitrogen accessibility to boron-rich covalent organic frameworks via electrochemical excitation for efficient nitrogen fixation. *Nat. Commun.* **10**, 3898 (2019). <https://doi.org/10.1038/s41467-019-11846-x>
- S5 Fang, Y. *et al.* Graphdiyne Interface Engineering: Highly Active and Selective Ammonia Synthesis. *Angew. Chem. Int. Ed.* **59**, 13021–13027 (2020). <https://doi.org/10.1002/anie.202004213>
- S6 Liu, S. *et al.* Altering the rate-determining step over cobalt single clusters leading to highly efficient ammonia synthesis. *Natl. Sci. Rev.* **8** (2021). <https://doi.org/10.1093/nsr/nwaa136>
- S7 Chen, Y. *et al.* Highly Productive Electrosynthesis of Ammonia by Admolecule-Targeting Single Ag Sites. *ACS Nano* **14**, 6938–6946 (2020). <https://doi.org/10.1021/acsnano.0c01340>
- S8 Guo, Y. *et al.* Regulating nitrogenous adsorption and desorption on Pd clusters by the acetylene linkages of hydrogen substituted graphdiyne for efficient electrocatalytic ammonia synthesis. *Nano Energy* **86**, 106099 (2021). <https://doi.org/10.1016/j.nanoen.2021.106099>
- S9 Liu, Y. *et al.* A Highly Efficient Metal-Free Electrocatalyst of F-Doped Porous Carbon toward N<sub>2</sub> Electroreduction. *Adv. Mater.* **32**, 1907690 (2020). <https://doi.org/10.1002/adma.201907690>
- S10 Chen, J. *et al.* The activation of porous atomic layered MoS<sub>2</sub> basal-plane to induce adjacent Mo atom pairs promoting high efficiency electrochemical N<sub>2</sub> fixation. *Appl. Catal. B* **285**, 119810 (2021). <https://doi.org/10.1016/j.apcatb.2020.119810>
- S11 Hao, Y.-C. *et al.* Promoting nitrogen electroreduction to ammonia with bismuth nanocrystals and potassium cations in water. *Nat. Catal.* **2**, 448–456 (2019). <https://doi.org/10.1038/s41929-019-0241-7>
- S12 Tao, H. *et al.* Nitrogen Fixation by Ru Single-Atom Electrocatalytic Reduction. *Chem* **5**, 204–214 (2019). <https://doi.org/10.1016/j.chempr.2018.10.007>
- S13 Zhang, S. *et al.* Electrocatalytically Active Fe-(O-C<sub>2</sub>)<sub>4</sub> Single-Atom Sites for Efficient Reduction of Nitrogen to Ammonia. *Angew. Chem. Int. Ed.* **59**, 13423–13429 (2020). <https://doi.org/10.1002/anie.202005930>

S14 Zhang, S. *et al.* Atomically dispersed bimetallic Fe–Co electrocatalysts for green production of ammonia. *Nat. Sustain.* **6**, 169–179 (2023). <https://doi.org/10.1038/s41893-022-00993-7>
